# Supplementary material for: The electronic structures of β-phase (Al x Ga 1− x ) 2 O 3 studied using DFT calculations
Source: Royal Society of Chemistry journal article supplement (doi:10.1039/d5cp03996g), 2026-01-01
Supplement: d5cp03996g1.pdf [file d5cp03996g1.pdf]

## Supplemental Material

### The electronic structures of $\beta$ -phase $(\text{Al}_x\text{Ga}_{1-x})_2\text{O}_3$ studied by DFT calculations

Ziqian Sheng<sup>1,2</sup>, Wenjing Xu<sup>1,2</sup>, Xiaoqing Zhou<sup>1,2</sup>, Cien Liu<sup>1,2</sup>, Alexander Polyakov<sup>3</sup>, Zhilai Fang<sup>4</sup>, Ning Jia<sup>5,6\*</sup>, Xiangyu Xu<sup>1,2\*</sup>, Kelvin H.L. Zhang<sup>1,2\*</sup>

<sup>1</sup>Shenzhen Research Institute of Xiamen University, Shenzhen 518000, P. R. China

<sup>2</sup>State Key Laboratory of Physical Chemistry of Solid Surfaces, Collaborative Innovation Center of Chemistry for Energy Materials, College of Chemistry and Chemical Engineering, Xiamen University, Xiamen 361005, P. R. China

<sup>3</sup>Department of Semiconductor Electronics and Physics of Semiconductors, National University of Science and Technology MISiS, 4 Leninsky Avenue, Moscow 119049, Russia

<sup>4</sup>Department of Light Source and Illumination Engineering, Fudan University, Shanghai 200433, P. R. China

<sup>5</sup>Shanghai Institute of Optics and Precision Mechanics, Chinese Academy of Sciences, Shanghai 200433, P. R. China

<sup>6</sup>Shanghai Key Laboratory of Wide and Ultra-Wide Bandgap Semiconductor Materials, Shanghai 200433, P. R. China

\*Email: [jianing@siom.ac.cn](mailto:jianing@siom.ac.cn); [xuxiangyu@xmu.edu.cn](mailto:xuxiangyu@xmu.edu.cn); [kelvinzhang@xmu.edu.cn](mailto:kelvinzhang@xmu.edu.cn);

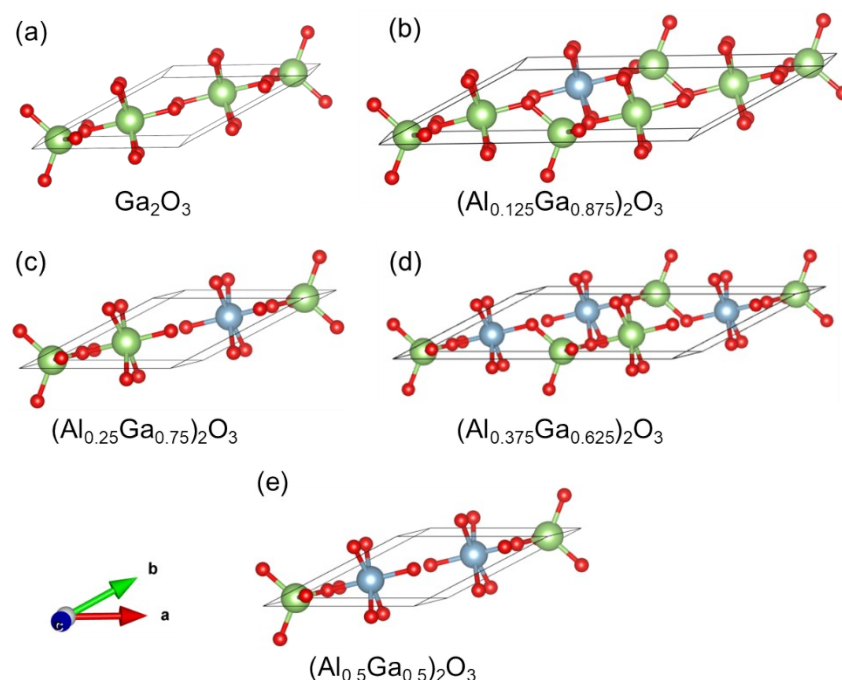

**Figure S1.** The crystal structure (a)  $\text{Ga}_2\text{O}_3$  primitive cell; (b)-(e)  $\beta$ - $(\text{Al}_x\text{Ga}_{1-x})_2\text{O}_3$  alloys for  $x = 0.125, 0.25, 0.375$  and  $0.50$ .

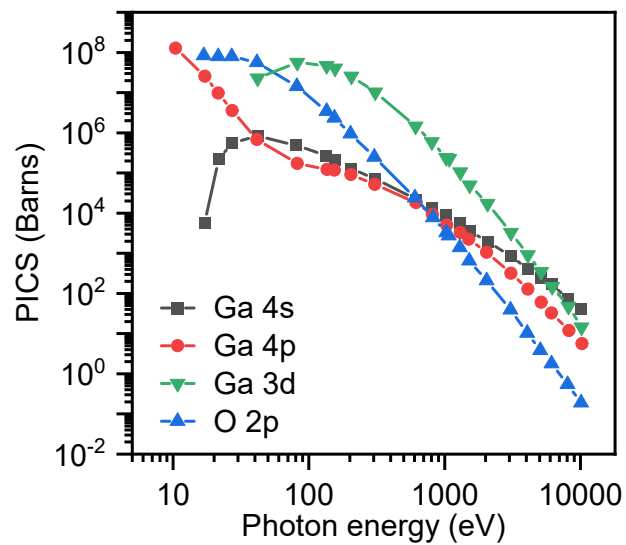

**Figure S2.** Relationship between the photoionization cross section of an electron and the photon energy of Ga 4s, Ga 4p, Ga 3d and O 2p.

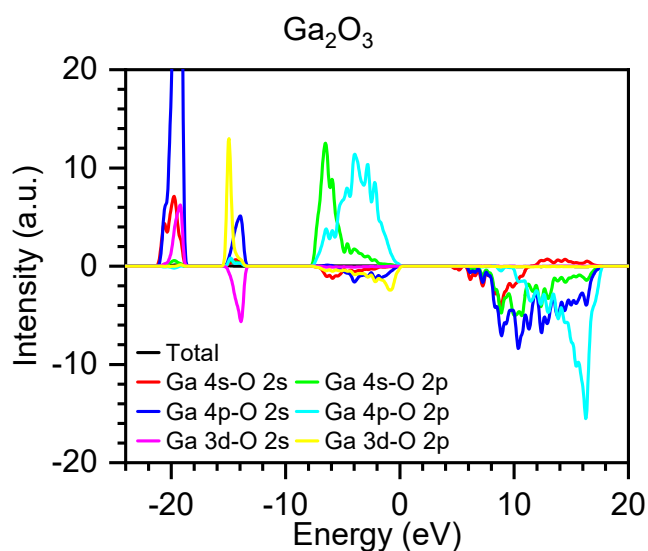

**Figure S3.** -pCOHP intensity of the orbital interactions between Ga and O atoms in  $\text{Ga}_2\text{O}_3$  and  $\beta\text{-(Al}_x\text{Ga}_{1-x})_2\text{O}_3$  alloys of  $x = 0.125, 0.25$ , and  $0.50$ .

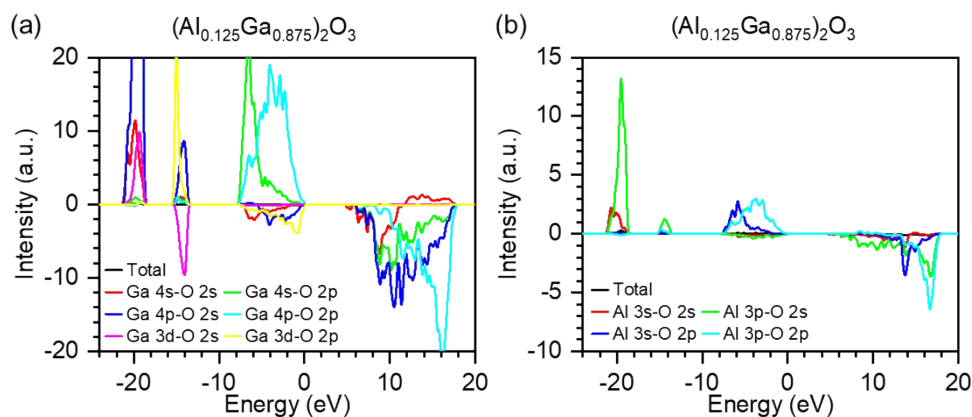

**Figure S4.** -pCOHP intensity of the orbital interactions between (a) Ga and O atoms (b) Al and O atoms for  $(\text{Al}_{0.125}\text{Ga}_{0.875})_2\text{O}_3$ .

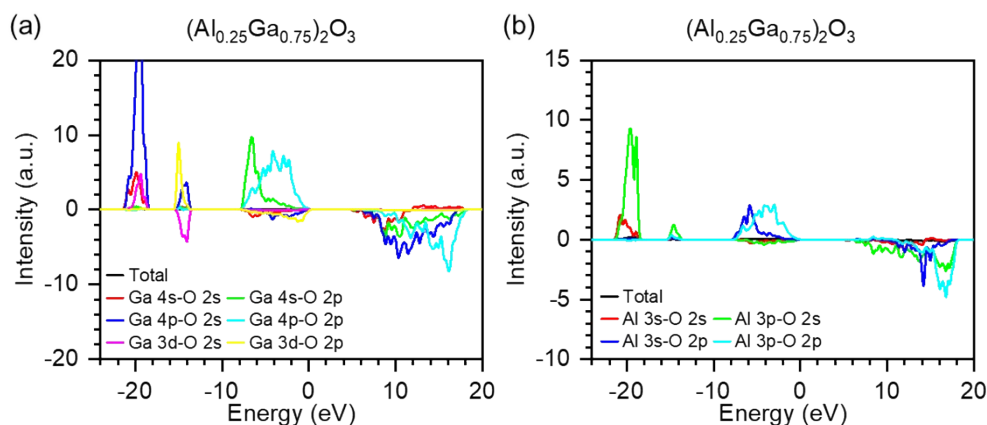

**Figure S5.** -pCOHP intensity of the orbital interactions between (a) Ga and O atoms (b) Al and O atoms for  $(\text{Al}_{0.25}\text{Ga}_{0.75})_2\text{O}_3$ .

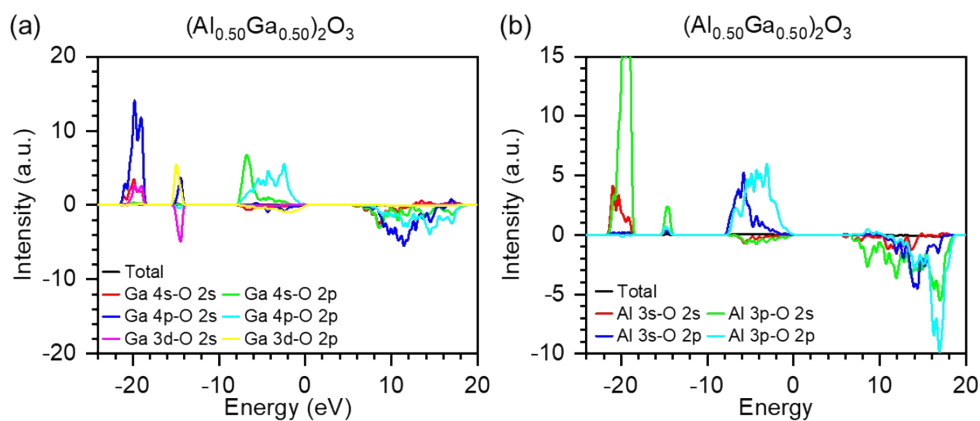

**Figure S6.** -pCOHP intensity of the orbital interactions between (a) Ga and O atoms (b) Al and O atoms for  $(\text{Al}_{0.50}\text{Ga}_{0.50})_2\text{O}_3$ .
